# Supplementary material for: Incomplete Vaccination and Its Predictors among Children in Ethiopia: A Systematic Review and Meta-Analysis
Source: PubMed Central journal article supplement — Glob Pediatr Health. 2020 Oct 30;7:2333794X20968681. doi: 10.1177/2333794X20968681 (PMC7675896; doi:10.1177/2333794x20968681), 2020-10-30
Supplement: Additional_file_2.pdf [file Additional_file_2.pdf]

**Search Strategy for PubMed**

| No | Database | Search filters (Year=01/01/1980 to 01/05/2020, Language=English), DATE OF THIS SEARCH [MAY 01, 2020]                                                                                                                                                                                                                                                                                                                                                                                                                                                                                                                                                                                                                                                                                                                                                                                                                                                                                                                                                                                                                                                                                                                                                                                                                                                                                                                                                                                                                                                                                                                                                                                                                                                                                                                                                                                                                                                                                                                                                                                                                                                                                                                                                                                                                                                                                                                                                                                                              |                   |
|----|----------|-------------------------------------------------------------------------------------------------------------------------------------------------------------------------------------------------------------------------------------------------------------------------------------------------------------------------------------------------------------------------------------------------------------------------------------------------------------------------------------------------------------------------------------------------------------------------------------------------------------------------------------------------------------------------------------------------------------------------------------------------------------------------------------------------------------------------------------------------------------------------------------------------------------------------------------------------------------------------------------------------------------------------------------------------------------------------------------------------------------------------------------------------------------------------------------------------------------------------------------------------------------------------------------------------------------------------------------------------------------------------------------------------------------------------------------------------------------------------------------------------------------------------------------------------------------------------------------------------------------------------------------------------------------------------------------------------------------------------------------------------------------------------------------------------------------------------------------------------------------------------------------------------------------------------------------------------------------------------------------------------------------------------------------------------------------------------------------------------------------------------------------------------------------------------------------------------------------------------------------------------------------------------------------------------------------------------------------------------------------------------------------------------------------------------------------------------------------------------------------------------------------------|-------------------|
|    |          | Combined search phrase                                                                                                                                                                                                                                                                                                                                                                                                                                                                                                                                                                                                                                                                                                                                                                                                                                                                                                                                                                                                                                                                                                                                                                                                                                                                                                                                                                                                                                                                                                                                                                                                                                                                                                                                                                                                                                                                                                                                                                                                                                                                                                                                                                                                                                                                                                                                                                                                                                                                                            | Search results    |
| 1  | PubMed   | (((((((((((("vaccination"[MeSH Terms] OR "vaccination"[All Fields]) OR (Incomplete[All Fields] AND ("vaccination"[MeSH Terms] OR "vaccination"[All Fields]))) OR (Full[All Fields] AND ("vaccination"[MeSH Terms] OR "vaccination"[All Fields]))) OR ((("vaccination"[MeSH Terms] OR "vaccination"[All Fields]) AND status[All Fields])) OR ("vaccination coverage"[MeSH Terms] OR ("vaccination"[All Fields] AND "coverage"[All Fields]) OR "vaccination coverage"[All Fields])) OR ("immunisation"[All Fields] OR "vaccination"[MeSH Terms] OR "vaccination"[All Fields] OR "immunization"[All Fields] OR "immunization"[MeSH Terms])) OR (Incomplete[All Fields] AND ("immunisation"[All Fields] OR "vaccination"[MeSH Terms] OR "vaccination"[All Fields] OR "immunization"[All Fields] OR "immunization"[MeSH Terms]))) OR (Full[All Fields] AND ("immunisation"[All Fields] OR "vaccination"[MeSH Terms] OR "vaccination"[All Fields] OR "immunization"[All Fields] OR "immunization"[MeSH Terms]))) OR ((("immunisation"[All Fields] OR "vaccination"[MeSH Terms] OR "vaccination"[All Fields] OR "immunization"[All Fields] OR "immunization"[MeSH Terms]) AND status[All Fields])) OR ("vaccination coverage"[MeSH Terms] OR ("vaccination"[All Fields] AND "coverage"[All Fields]) OR "vaccination coverage"[All Fields] OR ("immunization"[All Fields] AND "coverage"[All Fields]) OR "immunization coverage"[All Fields])) OR (("vaccines"[MeSH Terms] OR "vaccines"[All Fields] OR "vaccine"[All Fields]) AND dropout[All Fields])) OR Defaulter[All Fields]) OR (Expanded[All Fields] AND program[All Fields])) AND (((((((((Associated[All Fields] AND factors[All Fields]) OR (Factors[All Fields] AND associated[All Fields])) OR (Influencing[All Fields] AND factors[All Fields])) OR Predictors[All Fields]) OR (Predicting[All Fields] AND factors[All Fields])) OR Correlates[All Fields]) OR Determinants[All Fields]) OR ("risk factors"[MeSH Terms] OR ("risk"[All Fields] AND "factors"[All Fields]) OR "risk factors"[All Fields])) OR Barriers[All Fields]) OR Facilitators[All Fields])) AND (((("Childhood"[Journal] OR "childhood"[All Fields]) OR ("child"[MeSH Terms] OR "child"[All Fields] OR "children"[All Fields])) OR ("child"[MeSH Terms] OR "child"[All Fields])) OR ("infant"[MeSH Terms] OR "infant"[All Fields])) OR Preschool[All Fields])) AND ("ethiopia"[MeSH Terms] OR "ethiopia"[All Fields]) AND (("1980/01/01"[PDAT] : "2020/05/01"[PDAT]) AND English[lang]) | <b><u>166</u></b> |
