# Supplementary material for: Incomplete Vaccination and Its Predictors among Children in Ethiopia: A Systematic Review and Meta-Analysis
Source: PubMed Central journal article supplement — Glob Pediatr Health. 2020 Oct 30;7:2333794X20968681. doi: 10.1177/2333794X20968681 (PMC7675896; doi:10.1177/2333794x20968681), 2020-10-30
Supplement: Additional_file_3.pdf [file Additional_file_3.pdf]

Additional file 3a: Quality assessment of studies using JBI's critical appraisal tools designed for cross-sectional studies

| Studies                 | JBI's critical appraisal questions |    |    |    |    |    |    |    |    | Overall score | Include |
|-------------------------|------------------------------------|----|----|----|----|----|----|----|----|---------------|---------|
|                         | Q1                                 | Q2 | Q3 | Q4 | Q5 | Q6 | Q7 | Q8 | Q9 |               |         |
| Ali et al., 2019        | Y                                  | Y  | Y  | Y  | Y  | Y  | Y  | Y  | Y  | 9             | ✓       |
| Animaw et al., 2014     | Y                                  | Y  | Y  | Y  | Y  | Y  | Y  | Y  | Y  | 9             | ✓       |
| CSA ,2019               | Y                                  | N  |    | U  | Y  | Y  | Y  | Y  | Y  | 7             | ✓       |
| CSA ,2016               | Y                                  | N  |    | Y  | Y  | Y  | Y  | Y  | Y  | 7             | ✓       |
| Debie & Lakew, 2020     | Y                                  | N  | Y  | Y  | Y  | Y  | N  | Y  | Y  | 7             | ✓       |
| Deressa et al., 2020    | N                                  | N  | N  | Y  | U  | Y  | Y  | Y  | Y  | 5             | ✓       |
| Ebot, 2015              | Y                                  | Y  | Y  | Y  | Y  | Y  | U  | N  | Y  | 7             | ✓       |
| Etana & Deressa, 2012   | Y                                  | N  | N  | Y  | Y  | Y  | U  | U  | Y  | 5             | ✓       |
| Girmay & Dadi, 2019     | Y                                  | Y  | Y  | N  | Y  | Y  | U  | Y  | Y  | 7             | ✓       |
| Gualu & Dilie, 2017     | Y                                  | U  | Y  | N  | Y  | Y  | Y  | Y  | Y  | 7             | ✓       |
| Hailu et al., 2019      | Y                                  | Y  | Y  | Y  | Y  | Y  | Y  | Y  | N  | 8             | ✓       |
| Kassahun et al., 2015   | Y                                  | Y  | Y  | Y  | Y  | Y  | N  | Y  | Y  | 8             | ✓       |
| Kidane & Tekie, 2003    | Y                                  | N  | N  | Y  | Y  | Y  | U  | U  | Y  | 5             | ✓       |
| Kidane et al., 2019     | N                                  | Y  | U  | Y  | Y  | Y  | Y  | Y  | Y  | 7             | ✓       |
| Kinfe et al., 2019      | Y                                  | N  | Y  | N  | Y  | Y  | Y  | Y  | Y  | 7             | ✓       |
| Lakew et al., 2015      | N                                  | N  | Y  | Y  | Y  | Y  | Y  | Y  | Y  | 7             | ✓       |
| Legesse & Dechasa, 2015 | Y                                  | Y  | Y  | Y  | Y  | Y  | Y  | Y  | Y  | 9             | ✓       |
| Mekonnen et al., 2019   | Y                                  | Y  | Y  | Y  | Y  | Y  | Y  | Y  | Y  | 9             | ✓       |
| Meleko et al., 2017     | Y                                  | N  | N  | Y  | Y  | Y  | Y  | Y  | Y  | 7             | ✓       |
| Negero MG eat al., 2019 | Y                                  | Y  | Y  | Y  | Y  | Y  | Y  | Y  | Y  | 9             | ✓       |
| Mesfin, 2015            | Y                                  | Y  | Y  | Y  | Y  | U  | Y  | Y  | Y  | 8             | ✓       |
| Mohammed & Atomsa, 2013 | N                                  | Y  | U  | Y  | Y  | Y  | N  | Y  | Y  | 6             | ✓       |
| Mohamud et al., 2014    | Y                                  | Y  | N  | Y  | Y  | Y  | U  | Y  | Y  | 7             | ✓       |
| Okwaraji et al., 2012   | Y                                  | Y  | Y  | Y  | Y  | Y  | U  | N  | Y  | 7             | ✓       |
| Porth et al., 2020      | Y                                  | Y  | Y  | Y  | Y  | Y  | U  | N  | Y  | 7             | ✓       |
| Tamirat & Sisay, 2019   | Y                                  | N  | Y  | Y  | Y  | N  | Y  | Y  | Y  | 7             | ✓       |
| Tefera et al., 2018     | N                                  | Y  | Y  | Y  | Y  | U  | Y  | Y  | Y  | 7             | ✓       |
| Tesfaye et al., 2018    | Y                                  | Y  | Y  | Y  | Y  | Y  | U  | N  | Y  | 7             | ✓       |
| Tessema et al., 2019    | Y                                  | N  | U  | Y  | Y  | N  | Y  | Y  | Y  | 6             | ✓       |
| Tolera, 2014            | Y                                  | U  | Y  | Y  | Y  | Y  | U  | Y  | Y  | 7             | ✓       |

|                      |   |   |   |   |   |   |   |   |   |   |   |
|----------------------|---|---|---|---|---|---|---|---|---|---|---|
| Wado et al., 2014    | Y | U | U | Y | Y | Y | Y | Y | Y | 7 | ✓ |
| Workina et al., 2019 | Y | N | N | Y | Y | Y | Y | Y | Y | 7 | ✓ |
| Yismaw et al., 2019  | Y | Y | N | Y | Y | Y | Y | Y | Y | 8 | ✓ |

---

Y =Yes, N= No, U= Unclear, Q= Question. Overall score is calculated by counting the number of Ys in each row

Q1 = was the sample frame appropriate to address the target population? Q2 = were study participants sampled in an appropriate way? Q3 = was the sample size adequate? Q4 = were the study subjects and the setting described in detail? Q5 = was the data analysis conducted with sufficient coverage of the identified sample? Q6 = were valid methods used for the identification of the condition? Q7 = was the condition measured in a standard, reliable way for all participants? Q8 = was there appropriate statistical analysis? Q9 = was the response rate adequate, and if not, was the low response rate managed appropriately?

Additional file 3b: Quality assessment of studies using JBI's critical appraisal tools designed for Case control and cohort studies

---

| Studies               | JBI's critical appraisal questions |    |    |    |    |    |    |    |    |     |     | Overall score | Include |
|-----------------------|------------------------------------|----|----|----|----|----|----|----|----|-----|-----|---------------|---------|
|                       | Q1                                 | Q2 | Q3 | Q4 | Q5 | Q6 | Q7 | Q8 | Q9 | Q10 | Q11 |               |         |
| Aregawi et al., 2017  | Y                                  | Y  | Y  | Y  | Y  | Y  | Y  | Y  | Y  | N/A | N/A | 9             | ✓       |
| Asfaw et al., 2016    | N                                  | Y  | Y  | Y  | Y  | N  | N  | Y  | N  | N/A | N/A | 8             | ✓       |
| G/Mariam et al., 2018 | Y                                  | U  | Y  | Y  | Y  | Y  | Y  | Y  | Y  | N/A | N/A | 8             | ✓       |
| Kindie Yenit, 2015    | Y                                  | Y  | Y  | Y  | Y  | N  | N  | Y  | Y  | N/A | N/A | 6             | ✓       |
| Negussie et al., 2016 | Y                                  | Y  | U  | Y  | U  | N  | U  | U  | Y  | Y   | Y   | 9             | ✓       |

---

Y= Yes, N= No, U= Unclear, N/A= not applicable Q Question. Overall score is calculated by counting the number of Ys in each row Q1= was sample representative of patients in the population as a whole? Q2=Are the patients at a similar point in the course of their condition /illness? Q3= has bias been minimized in relation to selection of cases and of controls? Q4=Are confounding factors identified and strategies to deal with them stated? Q5=Are out comes assessed using objective criteria? Q6=was follow up carried out over a sufficient time period? Q7=were the outcomes of people who withdrew described and included in the analysis? Q8=were out comes measured in reliable way? Q9= was appropriate statistical analysis used? Q10= were the groups/participants free of the outcome at the start of the study (or at the moment of exposure) Q11= was follow up complete, and if not, were the reasons to loss to follow up described and explored?
